# Supplementary material for: Co-evolution networks of HIV/HCV are modular with direct association to structure and function
Source: PubMed Central journal article supplement (PMC6145588; doi:10.1371/journal.pcbi.1006409), 2018-09-07
Supplement: pcbi.1006409.s001.pdf [file pcbi.1006409.s001.pdf]

## Supplementary Information

### Co-evolution networks of HIV/HCV are modular with direct association to structure and function

Ahmed Abdul Quadeer<sup>1</sup>, David Morales-Jimenez<sup>2</sup>, Matthew R. McKay<sup>1,3\*</sup>,

**1** Department of Electronic and Computer Engineering, The Hong Kong University of Science and Technology, Hong Kong.

**2** Institute of Electronics, Communications and Information Technology, Queen's University Belfast, Belfast, UK.

**3** Department of Chemical and Biological Engineering, The Hong Kong University of Science and Technology, Hong Kong.

\*Corresponding author: m.mckay@ust.hk

### S1 Text. Details of the PCA-based inference method [1]

Similar to RoCA, the PCA-based method [1] is based on the Pearson correlation matrix, but it differs markedly from RoCA in the eigenvector estimation approach: PCA naively performs a classical spectral decomposition (i.e., it directly uses  $\mathbf{q}_k$  (see Eq (2) in Materials and Methods) as the eigenvector estimates), while RoCA involves a state-of-the-art sparse estimation method, as detailed in the Materials and Methods section. PCA sectors are formed by thresholding the sample eigenvectors  $\mathbf{q}_k$  (using a small threshold  $\epsilon = 0.005$ ) to disregard spurious coordinates [1]. Note that, due to the prominent statistical noise in  $\mathbf{q}_k$  (evident in Fig 4B and S4 Fig), such thresholding procedure of PCA results in very large sectors as compared with RoCA, where the sparse eigenvector estimates  $\mathbf{p}_k$  are used instead (S3 Fig). Thus in [1], the sectors obtained from this initial thresholding are further post-processed to (i) remove all residues with no significant intra-sector correlations, and (ii) *enforce the sectors to be non-overlapping*. These constrained post-processing steps are not present in RoCA and, as such, RoCA sectors may comprise a few overlapping residues (gray circles in Fig 2A and S1 Fig). Implementation details of PCA can be found in [1].

### References

1. Quadeer AA, Louie RHY, Shekhar K, Chakraborty AK, Hsing IM, McKay MR. Statistical linkage analysis of substitutions in patient-derived sequences of genotype 1a hepatitis C virus nonstructural protein 3 exposes targets for immunogen design. *J Virol.* 2014;88(13):7628–44. doi:10.1128/JVI.03812-13.
