# Supplementary material for: Co-evolution networks of HIV/HCV are modular with direct association to structure and function
Source: PubMed Central journal article supplement (PMC6145588; doi:10.1371/journal.pcbi.1006409), 2018-09-07
Supplement: pcbi.1006409.s006.pdf [file pcbi.1006409.s006.pdf]

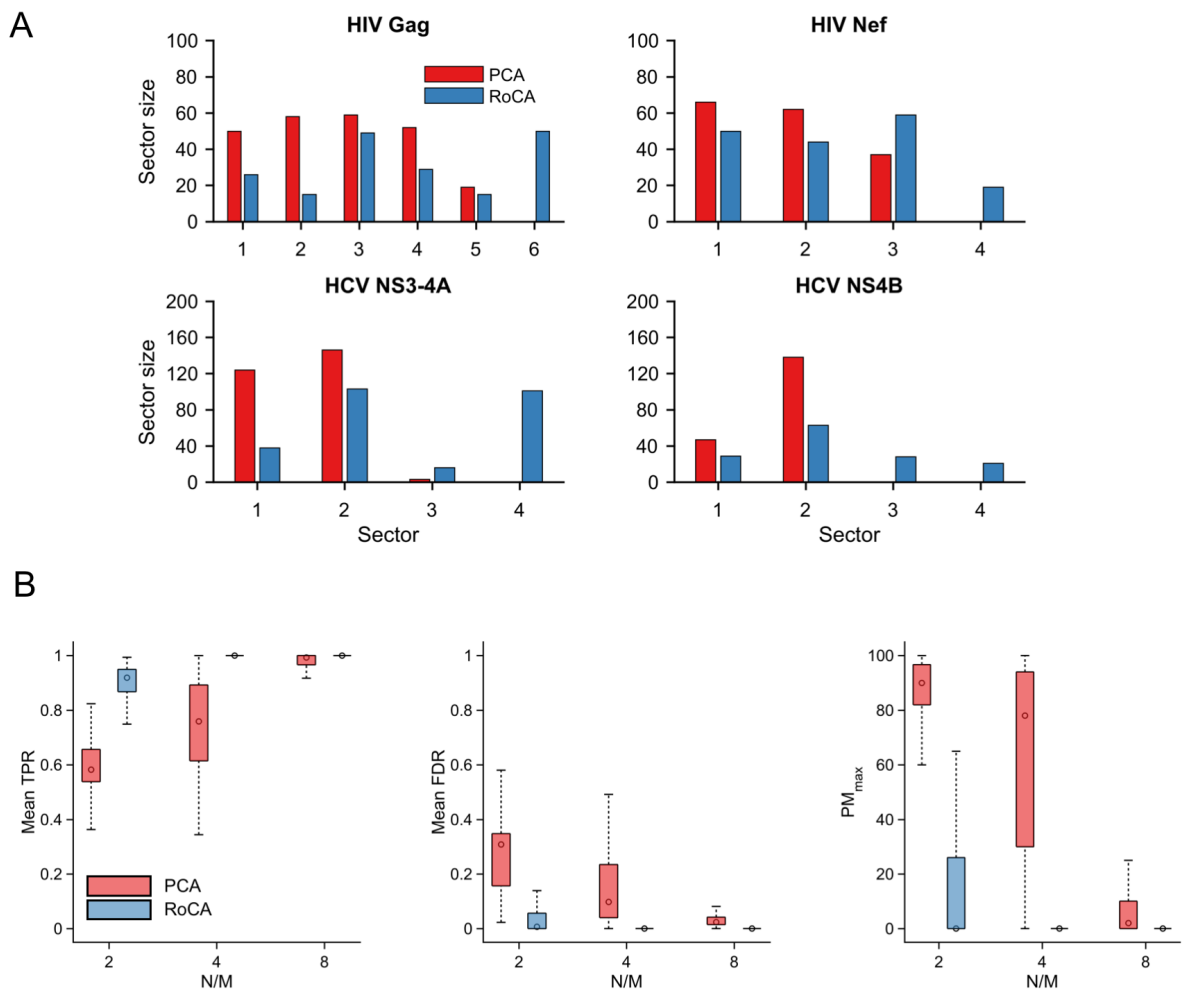

**Fig S3. Comparison of the sectors inferred using the PCA-based method [1] and the proposed RoCA method.** (A) Comparison of sector sizes obtained using PCA and RoCA for the studied viral proteins. PCA sectors were inferred by applying the method proposed in [1] on the available sequence data of each viral protein. The y-axis shows the number of residues present in each sector. (B) Comparison of the robustness of RoCA and PCA [1] methods to finite sampling present using binary synthetic data. The parameters used in the simulation were  $M = 500$  residues and  $r = 5$  non-overlapping units  $S_i$  of size 12%, 10%, 8%, 6%, and 4% of  $M$ , respectively for  $i = 1, \dots, 5$ . The corresponding  $\ell_i$  were set to equally spaced values between  $\ell_1 = 6$  and  $\ell_5 = 4$ , and to model the phylogenetic effect, we set  $\ell_0 = 8$ . To test the finite-sampling effect, results are presented for varying number of samples  $N = 1000, 2000$ , and  $4000$  corresponding to  $\frac{N}{M} = 2, 4$ , and  $8$ , respectively. The sectors inferred using RoCA and PCA [1] are compared using mean TPR, mean FDR, and the maximum percentage mismatch  $PM_{\max}$ . In each box plot, the black circle indicates the median, the edges of the box represent the first and third quartiles, and whiskers extend to span a 1.5 inter-quartile range from the edges.

## References

1. Quadeer AA, Louie RHY, Shekhar K, Chakraborty AK, Hsing IM, McKay MR. Statistical linkage analysis of substitutions in patient-derived sequences of genotype 1a hepatitis C virus nonstructural protein 3 exposes targets for immunogen design. *J Virol.* 2014;88(13):7628–44. doi:10.1128/JVI.03812-13.
