# Supplementary material for: Co-evolution networks of HIV/HCV are modular with direct association to structure and function
Source: PubMed Central journal article supplement (PMC6145588; doi:10.1371/journal.pcbi.1006409), 2018-09-07
Supplement: pcbi.1006409.s009.pdf [file pcbi.1006409.s009.pdf]

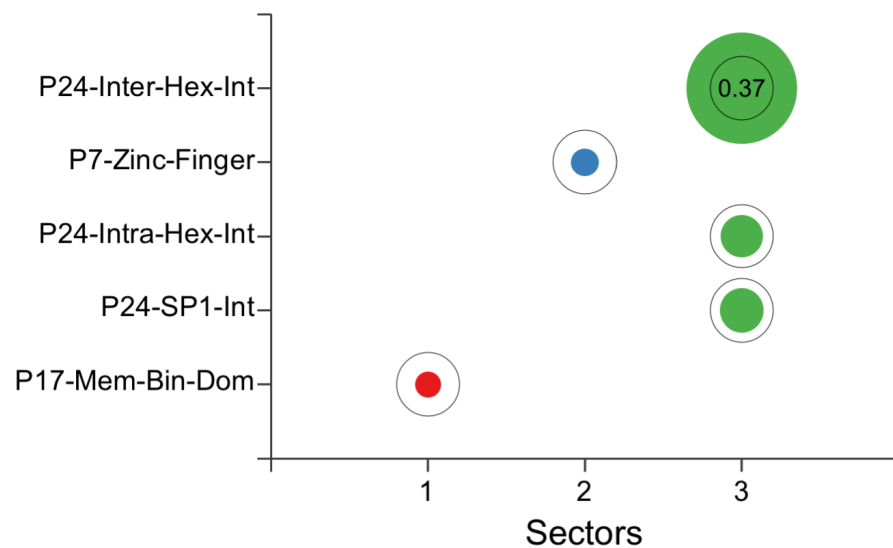

**Fig S6. Biochemical association of the previously identified HIV Gag sectors listed in the Supporting Information of [1].** These sectors were inferred in [1] using the HIV Gag sequence data available at the time of publication. For all structural interfaces, the contact-defining distance between the alpha-carbon atoms was set to  $d = 7\text{\AA}$ . The inference method in [1] is similar to the PCA approach [2] tested in this paper, mainly differing in the procedure to form sectors from eigenvectors; specifically, the method in [1] formed sectors from visual inspection of eigenvector biplots, whereas an automated procedure was applied in [2]. Similar to [2], the method in [1] produced relatively large sectors that did not show the highly resolved and modular biochemical association revealed by RoCA (Fig 3). Importantly, no sector reported in [1] was found to be associated with RP. This was due to the fact that the residues in the biochemical domain important in this case (p24-SP1 interface; see *Results*) were mixed up with the epitope residues associated with LTNP in sector 3.

## References

1. Dahirel V, Shekhar K, Pereyra F, Miura T, Artyomov M, Talsania S, et al. Coordinate linkage of HIV evolution reveals regions of immunological vulnerability. *Proc Natl Acad Sci.* 2011;108(28):11530–11535. doi:10.1073/pnas.1105315108.
2. Quadeer AA, Louie RHY, Shekhar K, Chakraborty AK, Hsing IM, McKay MR. Statistical linkage analysis of substitutions in patient-derived sequences of genotype 1a hepatitis C virus nonstructural protein 3 exposes targets for immunogen design. *J Virol.* 2014;88(13):7628–44. doi:10.1128/JVI.03812-13.
