# Supplementary material for: Co-evolution networks of HIV/HCV are modular with direct association to structure and function
Source: PubMed Central journal article supplement (PMC6145588; doi:10.1371/journal.pcbi.1006409), 2018-09-07
Supplement: pcbi.1006409.s010.pdf [file pcbi.1006409.s010.pdf]

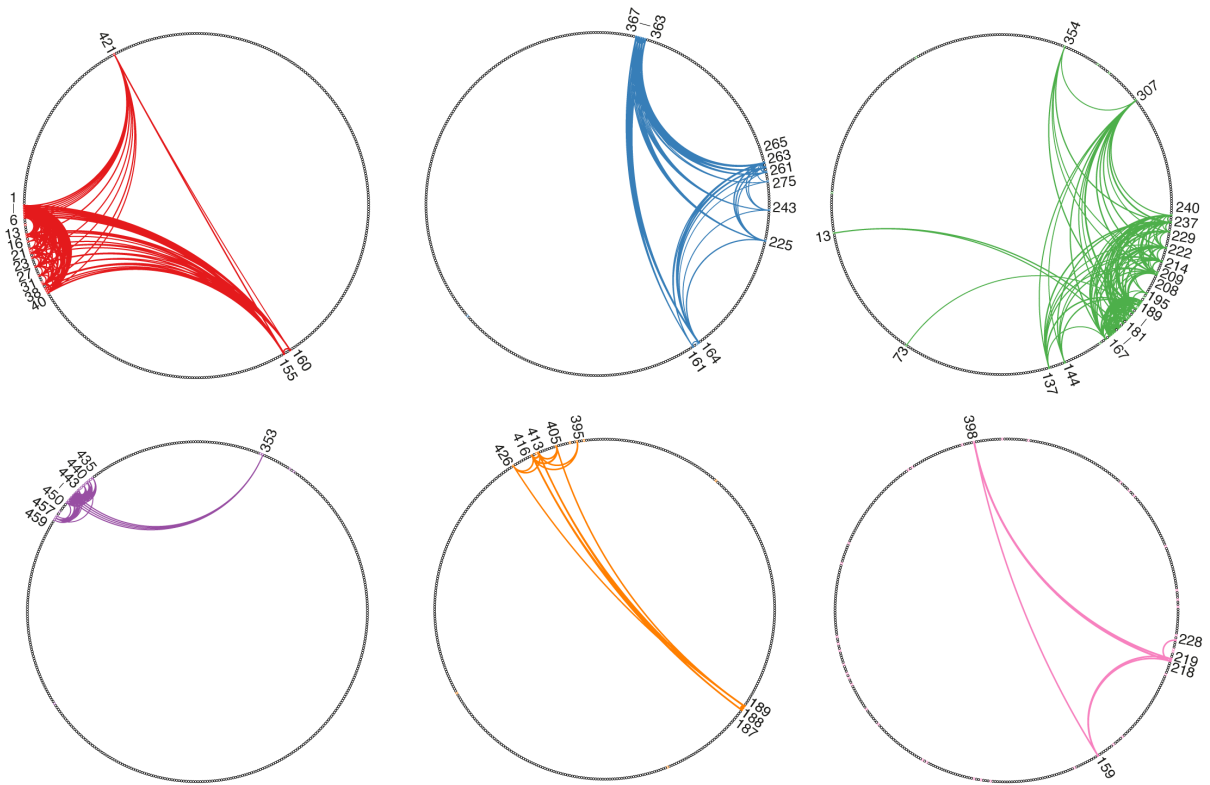

**Fig S7. Presence of long-range interactions in the predicted RoCA sectors.** Circular plots showing both the short and long-range mutational interactions in the six RoCA sectors predicted for HIV Gag. The interactions among residues in a sector are represented with colored lines following the scheme specified in Fig 2A. For better visualization, only the strong interactions ( $|\hat{C}_{ij}| > 0.1$ ) involved in each sector are shown.
