# Supplementary material for: Co-evolution networks of HIV/HCV are modular with direct association to structure and function
Source: PubMed Central journal article supplement (PMC6145588; doi:10.1371/journal.pcbi.1006409), 2018-09-07
Supplement: pcbi.1006409.s011.pdf [file pcbi.1006409.s011.pdf]

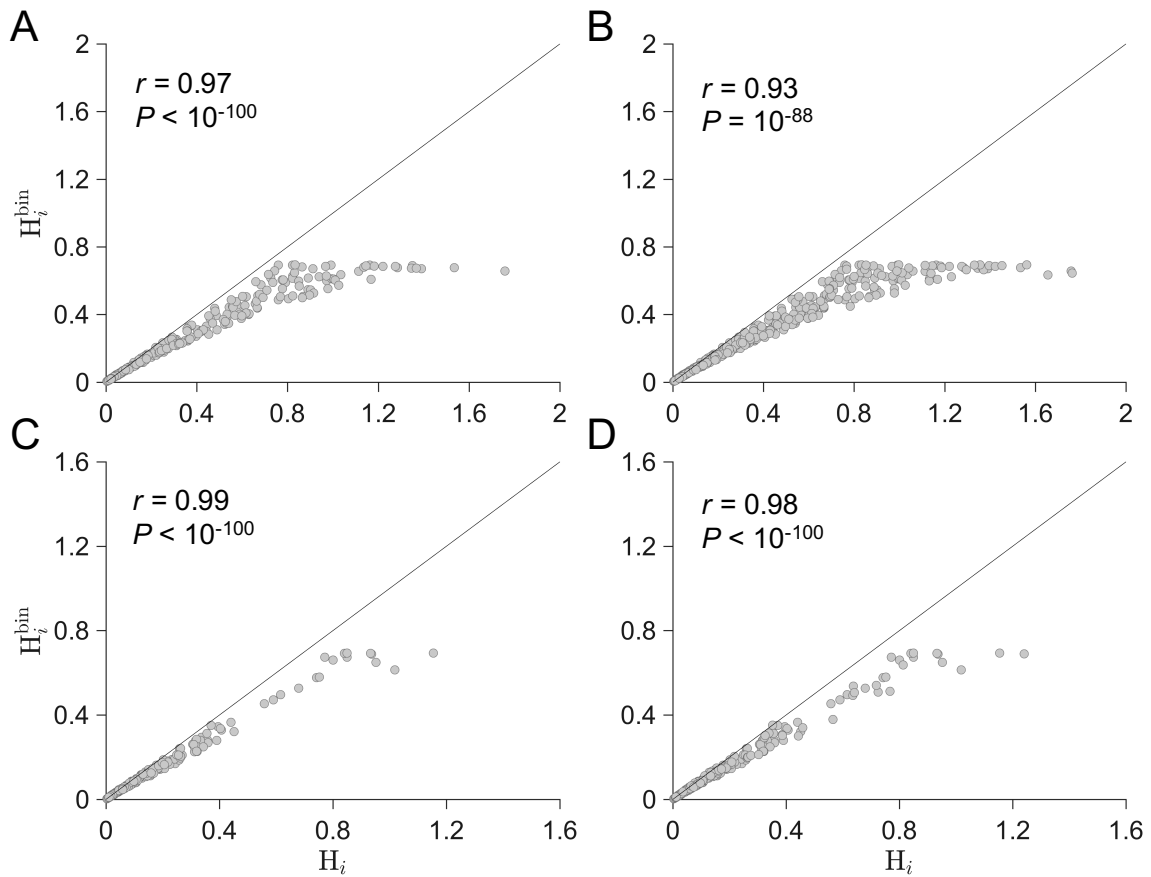

**Fig S8. Comparison of the entropy per residue of the amino acid MSA and that of the binarized MSA for (A) HIV Gag, (B) HIV Nef, (C) HCV NS3-4A, and (D) HCV NS4B.** A high positive Pearson correlation  $r$  (close to 1) with very high statistical significance (very small  $P$ ) is obtained between the entropy per residue of the amino acid MSA ( $H_i$ ) and that of the binarized MSA ( $H_i^{\text{bin}}$ ) in all cases; for details on the entropy computation, see [1]. This demonstrates that the binary MSA is a good approximation of the amino acid MSA for the considered viral proteins.

## References

1. Quadeer AA, Louie RHY, Shekhar K, Chakraborty AK, Hsing IM, McKay MR. Statistical linkage analysis of substitutions in patient-derived sequences of genotype 1a hepatitis C virus nonstructural protein 3 exposes targets for immunogen design. *J Virol.* 2014;88(13):7628–44. doi:10.1128/JVI.03812-13.
