# Supplementary material for: Co-evolution networks of HIV/HCV are modular with direct association to structure and function
Source: PubMed Central journal article supplement (PMC6145588; doi:10.1371/journal.pcbi.1006409), 2018-09-07
Supplement: pcbi.1006409.s015.pdf [file pcbi.1006409.s015.pdf]

**Table S1. List of HLA class I restricted epitopes associated with long-term non-progressors (LTNP) and rapid progressors (RP) in HIV Gag.**

| No. | Association | Epitope | Restricting HLA | Peptide sequence |
|-----|-------------|---------|-----------------|------------------|
| 1   | LTNP        | 19–27   | B*2705          | IRLRPGGKK        |
| 2   |             | 145–155 | A*2501          | QAISPRTLNAW      |
| 3   |             | 147–155 | B*5701          | ISPRTLNAW        |
| 4   |             | 162–172 | B*5701, B*5703  | KAFSPEVIPMF      |
| 5   |             | 180–188 | Cw*0802         | TPQDLNTML        |
| 6   |             | 203–212 | A*2501          | ETINEEAAEW       |
| 7   |             | 240–249 | B*5701, B*5801  | TSTLQEQIGW       |
| 8   |             | 263–272 | B*2705          | KRWIILGLNK       |
| 9   |             | 298–306 | B*1402          | DRFYKTLRA        |
| 10  |             | 305–313 | Cw*0802         | RAEQASQEV        |
| 1   | RP          | 36–44   | B*3501          | WASRELERF        |
| 2   |             | 78–86   | A*2902          | LYNTVATLY        |
| 3   |             | 254–262 | B*3501          | PPIPVGDIY        |
| 4   |             | 260–267 | B*0801          | EIYKRWII         |
| 5   |             | 355–363 | B*0702          | GPGHKARVL        |
